# Supplementary material for: Peroxiredoxin V (PrdxV) negatively regulates EGFR/Stat3-mediated fibrogenesis via a Cys48-dependent interaction between PrdxV and Stat3
Source: PubMed Central journal article supplement (PMC6584630; doi:10.1038/s41598-019-45347-0), 2019-06-19

**Article**

**Peroxiredoxin V (PrdxV) negatively regulates EGFR/Stat3-mediated fibrogenesis via a Cys48-dependent interaction between PrdxV and Stat3**

Hoon-In Choi<sup>1</sup>, Dong-Hyun Kim<sup>1</sup>, Jung Sun Park<sup>1</sup>, In Jin Kim<sup>1</sup>, Chang Seong Kim<sup>1</sup>, Eun Hui Bae<sup>1</sup>, Seong Kwon Ma<sup>1</sup>, Tae-Hoon Lee<sup>2</sup>, and Soo Wan Kim<sup>1\*</sup>

<sup>1</sup>Department of Internal Medicine, Chonnam National University Medical School, Gwangju, Korea and

<sup>2</sup>Department of Biochemistry, Dental Science Research Institute, School of Dentistry, Chonnam National University and Korea Mouse Phenotype Center, Gwangju, Korea

\*Corresponding Author

Full name: Dr. Soo Wan Kim

Department: Department of Internal Medicine

University/Hospital: Chonnam National University Medical School

Street Name & Number: 42 Jebongro

City, State, Postal code, Country: Gwangju, 61469, Korea

Tel: +82 62 220 6271

Fax: +82 62 225 8578

E-mail: skimw@chonnam.ac.kr

## Supplementary Figures.

### Supplementary Figure. S1

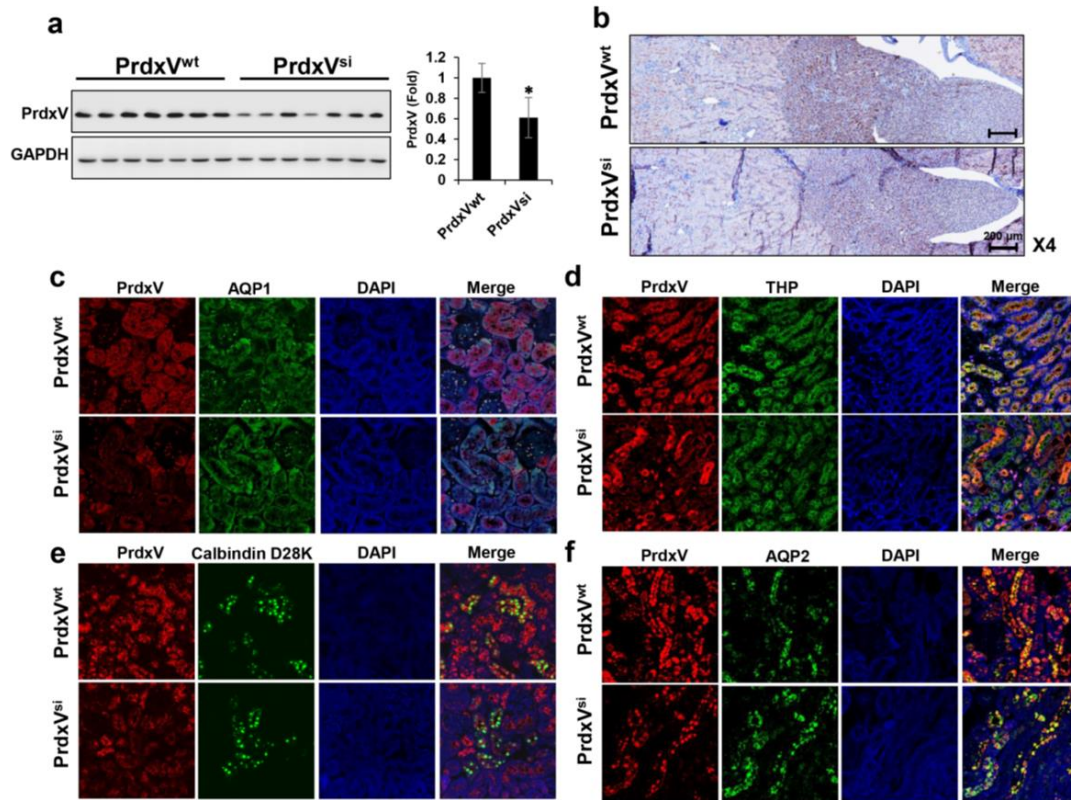

Comparison of PrdxV expression between PrdxV<sup>wt</sup> and PrdxV<sup>si</sup> mouse kidney. **(a)** Total protein level of PrdxV were assessed by western blotting. GAPDH was used as an internal control. Bar graphs show the mean PrdxV protein/GAPDH expression as measured by densitometry. \* $p < 0.05$ ; PrdxV<sup>wt</sup> vs. PrdxV<sup>si</sup>. **(b)** Light micrographs illustrating immunostaining of PrdxV of PrdxV<sup>wt</sup> and PrdxV<sup>si</sup> kidney. Immunolabeling is present from cortex to inner medullar. Image was magnified at x4, Bar = 200 μm. **(c-f)** Tubule specific expression of PrdxV (Red) were assessed by tubule markers (Green), AQP1, THP, Calbindin D28K, and AQP2, using immunofluorescence. Nucleus was stained with DAPI. Image was magnified at x400.

## Supplementary Figure. S2

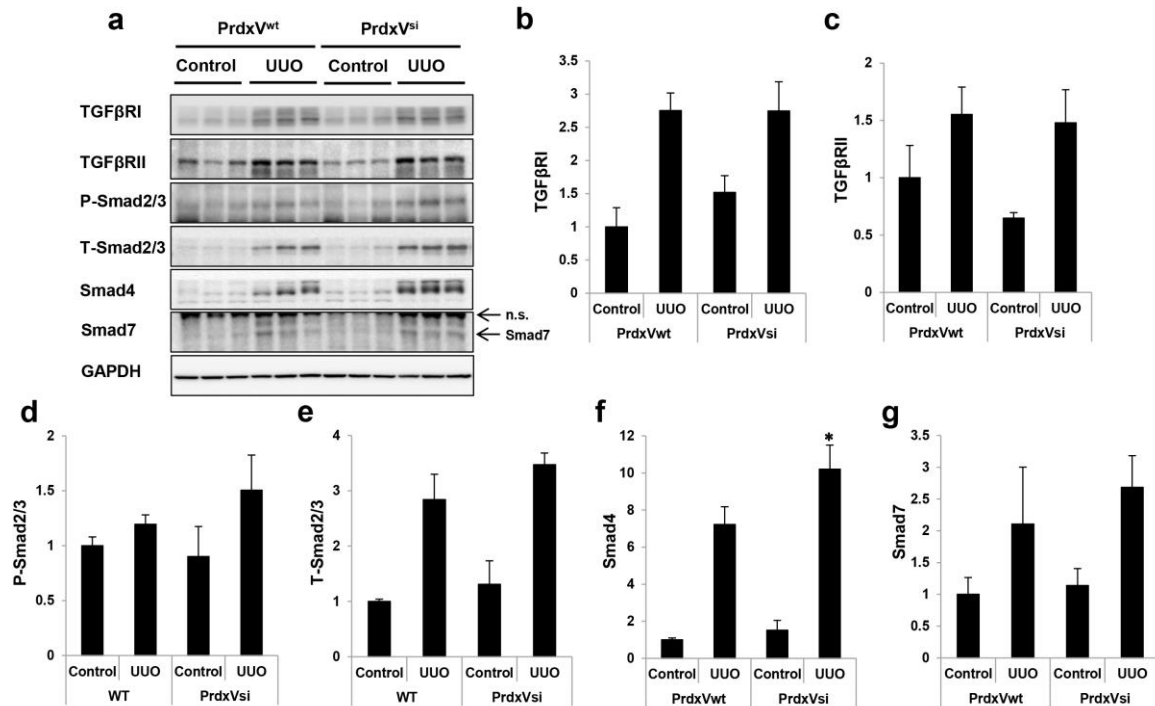

Canonical TGF- $\beta$  signaling pathway in UUO-induced PrdxV<sup>si</sup> mouse kidney. To verify the involvement of the canonical TGF- $\beta$  signaling pathway in renal fibrosis aggravated by knockdown of PrdxV, the expression levels and activation levels of major TGF- $\beta$ /Smad signaling molecules were assessed by western blotting (**a**). GAPDH was used as an internal control. (**b-e**) Bar graphs show the mean target protein/GAPDH expression as measured by densitometry (**a**; TGF $\beta$ R1, **c**; TGF $\beta$ R2, **d**; Phospho-Smad2/3, **e**; Total-Smad2/3).

# Uncropped western blotting data

**Figure 2**

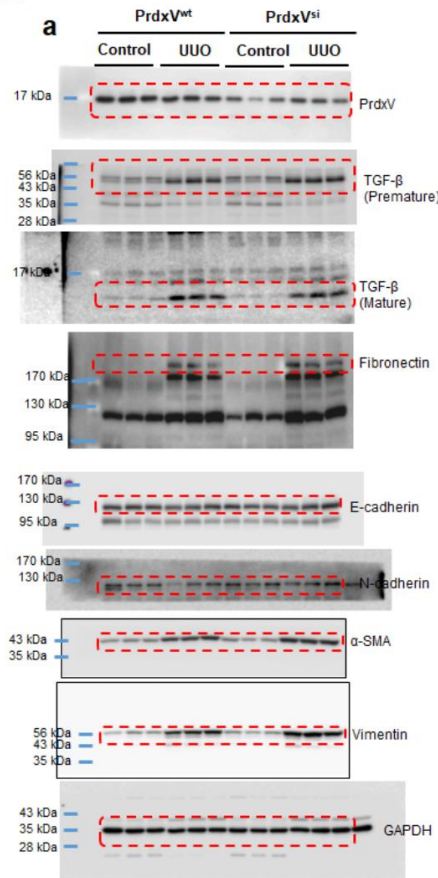

**Figure 3**

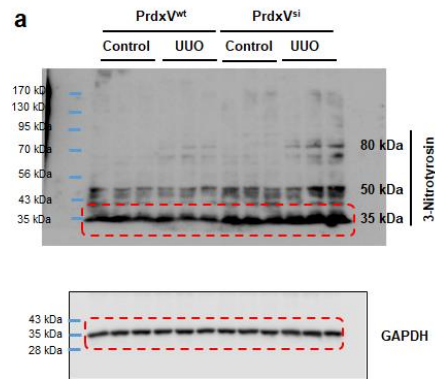

**Figure 4**

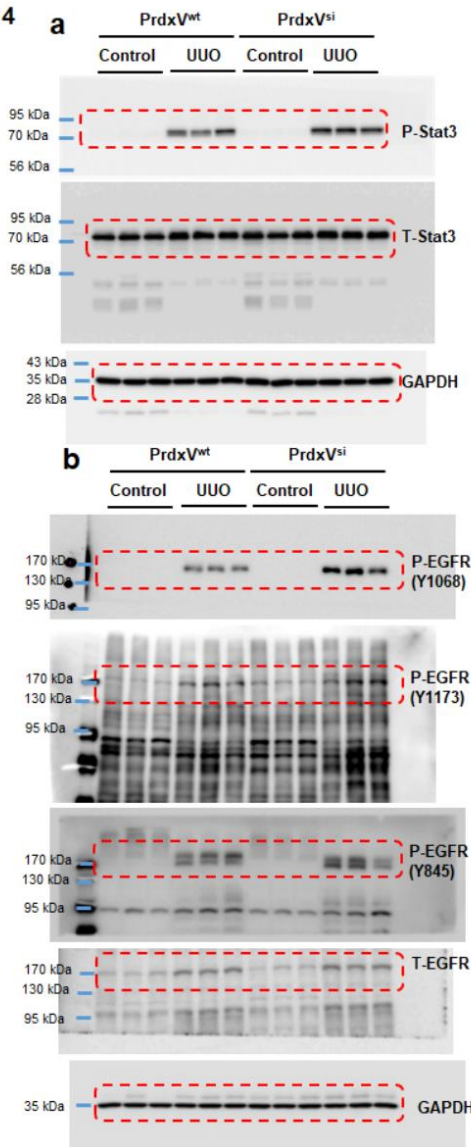

**Figure 5**

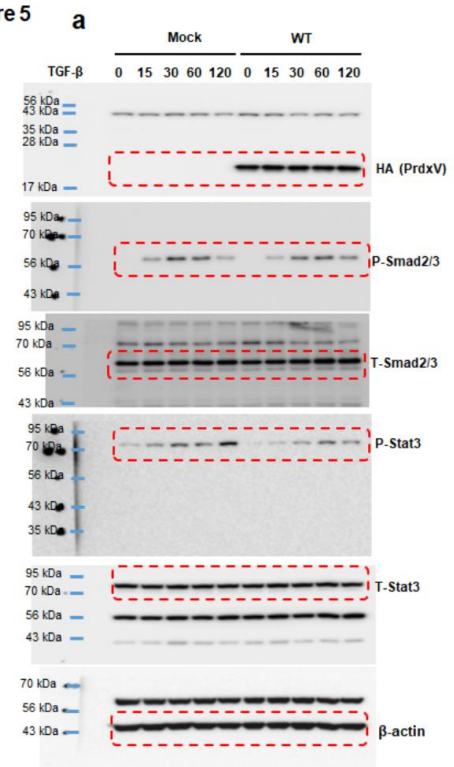

**Figure 5**

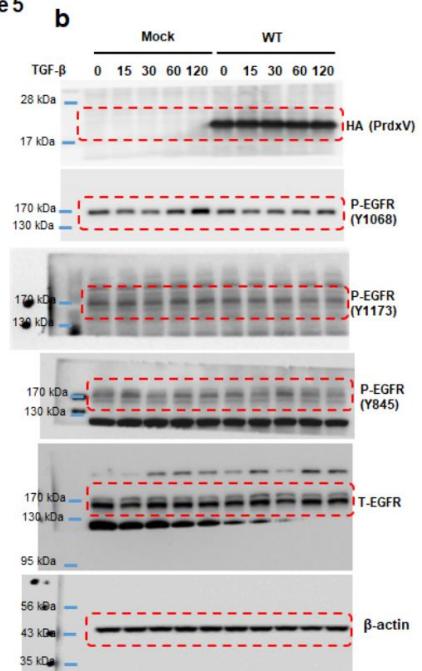

**Figure 6**

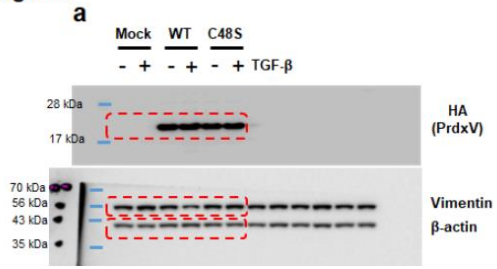

**Figure 7**

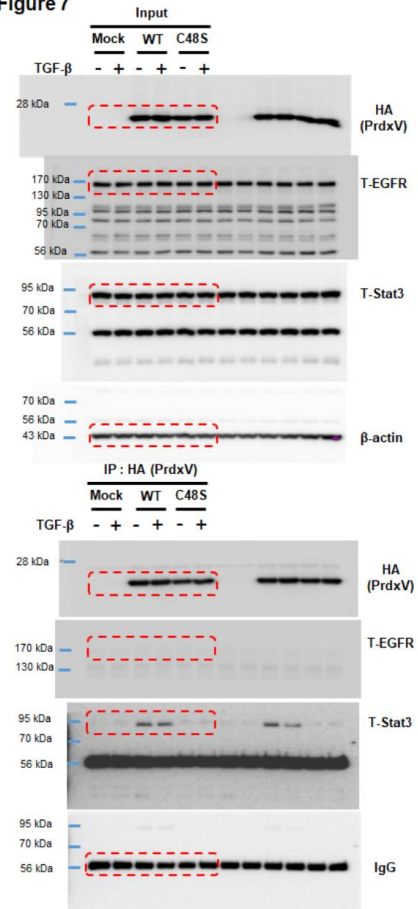

Supplementary Figure S1

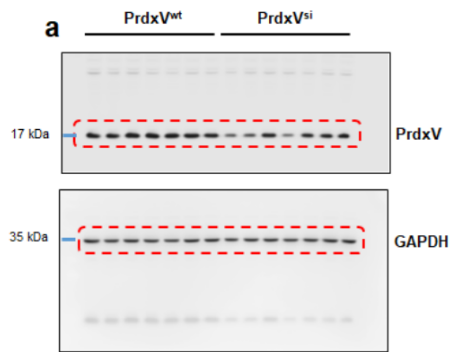

Supplementary Figure S2.

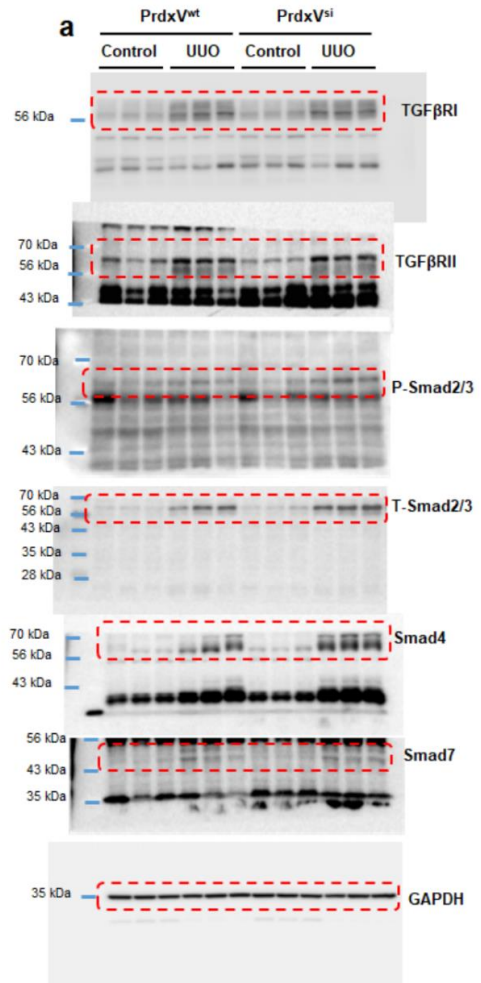

Supplement: 41598_2019_45347_MOESM1_ESM.pdf [file 41598_2019_45347_MOESM1_ESM.pdf]
